# Supplementary material
Source: PubMed Central journal article supplement (PMC5197074)
Supplement: thnov07p0413s1.pdf [file thnov07p0413s1.pdf]

Supplementary Figure S2. Left ventricular systolic function and maximal  $^{68}\text{Ga}$ -NOTA-MSA uptake in the non-treated myocarditis rats versus the myocarditis rats treated with cyclosporine-A.

Supplementary Figure S2.

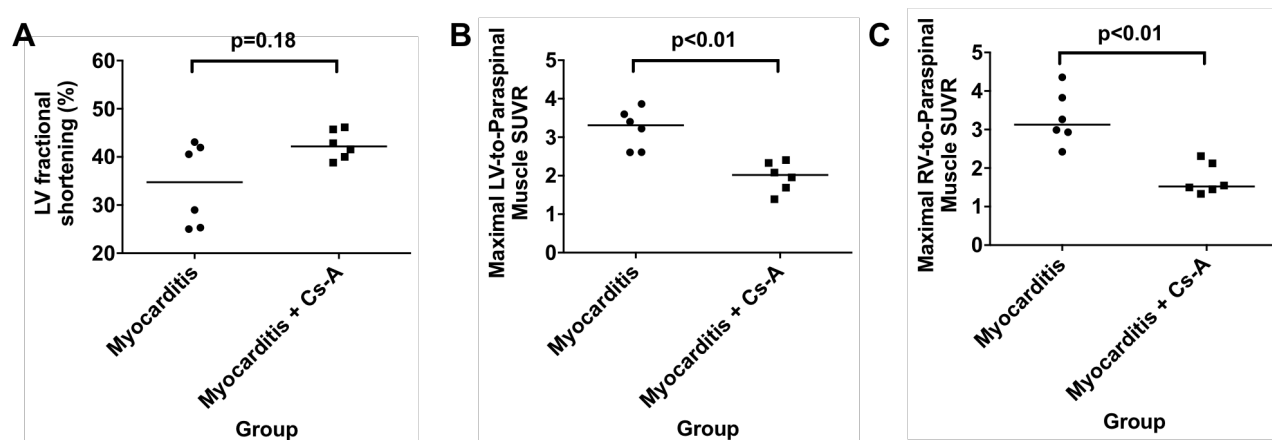

(A) No gross difference in the left ventricular (LV) fraction shortening between the non-treated myocarditis rats versus the myocarditis rats treated with cyclosporine-A. (B and C) Significantly lower maximal  $^{68}\text{Ga}$ -NOTA-MSA uptake at the LV (B) and the right ventricle (RV) (C) in the myocarditis rats treated with cyclosporine-A versus the non-treated myocarditis rats. The median value of each groups are shown as horizontal lines. SUVR, standard uptake value ratio.

**Supplementary Movie S1 (.avi format). Three-dimensional  $^{68}\text{Ga}$ -NOTA-MSA PET/CT image of a normal, control rat.**

**Supplementary Movie S2 (.avi format). Three-dimensional  $^{68}\text{Ga}$ -NOTA-MSA PET/CT image of a myocarditis rat.**
